# Supplementary material
Source: PubMed Central journal article supplement (PMC2638054)
Supplement: NIHMS86849-supplement-supl.pdf [file NIHMS86849-supplement-supl.pdf]

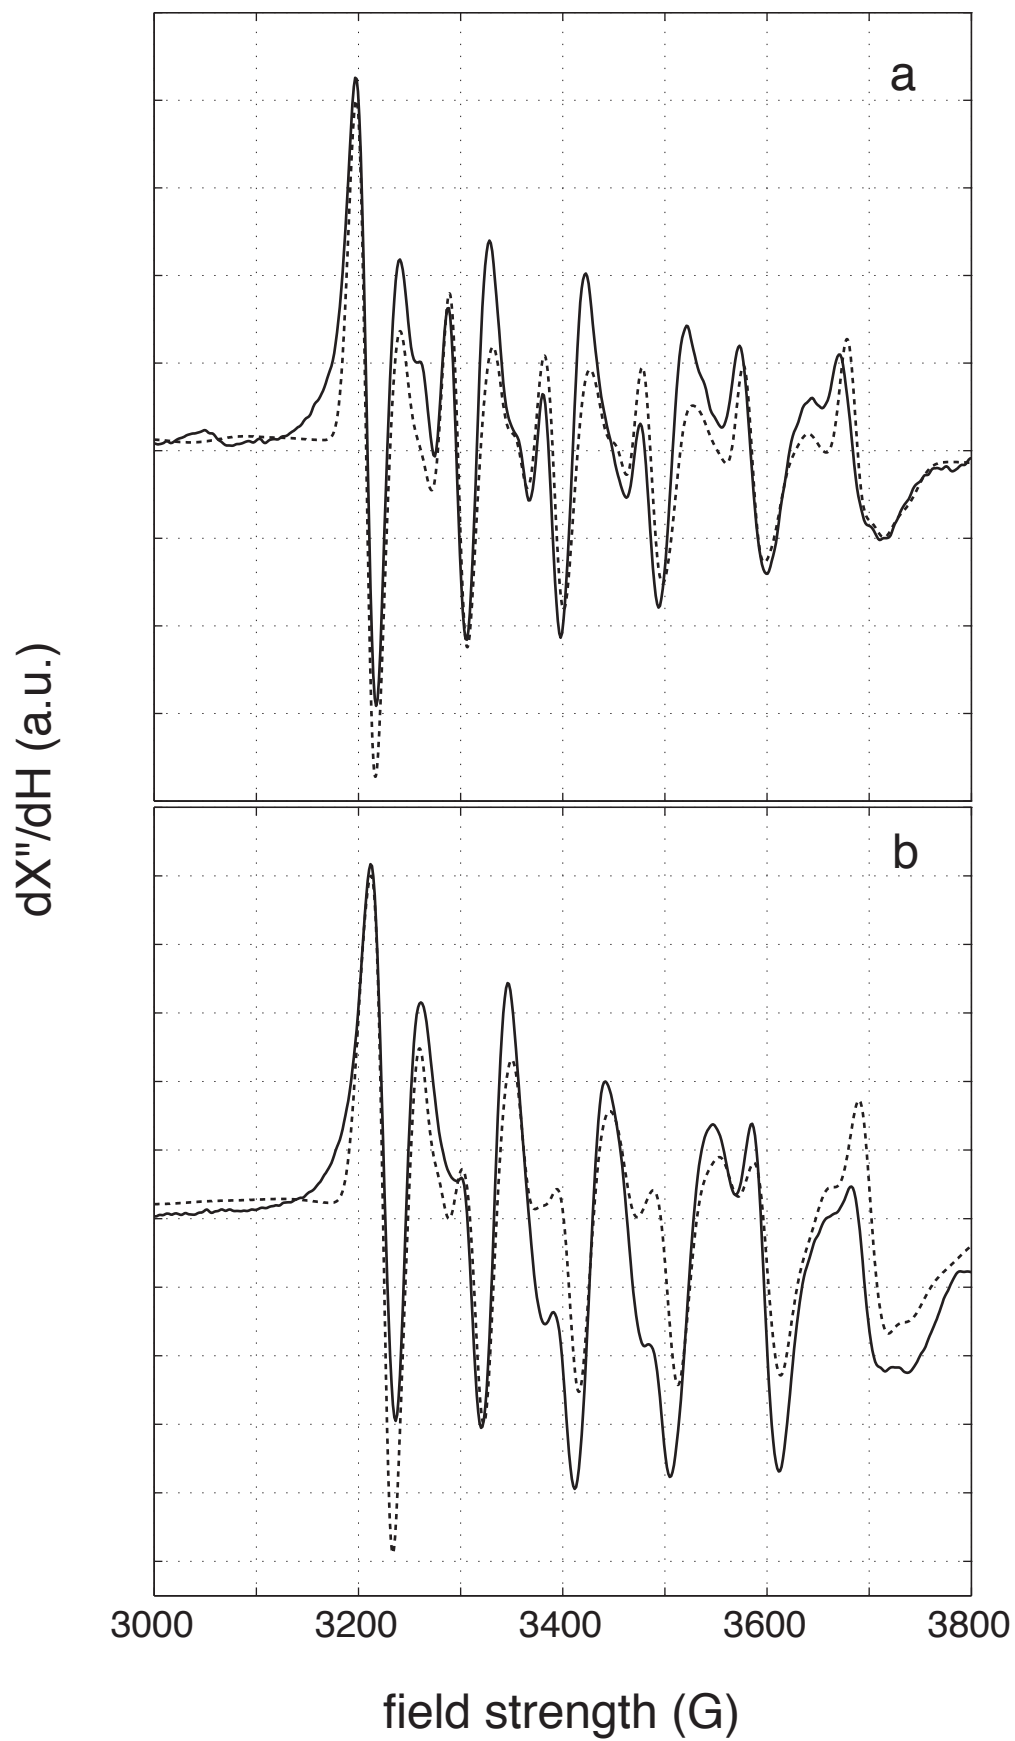

**Figure S1:** CW-EPR spectra (solid lines) and spectral simulations (dotted lines) for (a) reduced cytochrome *c* oxidase, and (b) reduced cytochrome *c* oxidase +cyanide. Data were collected on the Bruker E-680X EPR spectrometer in CW-mode using the Bruker 5mm dielectric resonator probe in a critically coupled configuration. Parameters used to collect EPR data were: sample temperature, 5 K; microwave frequency, 9.67 GHz (**A**) and 9.72 GHz (**B**); microwave power, 63  $\mu$ W; field modulation amplitude, 10 G; field modulation frequency, 10 kHz. Simulations were done using the XSOPHE program and the following parameters, for (a): microwave frequency, 9.67 GHz,  $g = 2.00$ ,  $D = 140$  G,  $E/D = 0.20$ ,  $a_{\text{iso}} = 96.5$  G,  $D$ -strain = 20G,  $E/D$  strain = .03 and intrinsic Gaussian linewidth = 8.0 G. For (b): microwave frequency, 9.72 GHz,  $g = 2.00$ ,  $D = 170$  G,  $E/D = 0.20$ ,  $a_{\text{iso}} = 96.5$  G,  $D$ -strain = 30G,  $E/D$  strain = .05 and intrinsic Gaussian linewidth = 8.0 G. 30 integration partitions were used in the simulations.
